# Supplementary material for: Influence of Magnesium Oxide on the Structure and Catalytic Activity of the Wustite Catalyst for Ammonia Synthesis
Source: MDPI journal article supplement (doi:10.3390/ma15238309), 2022-11-23
Supplement: s1 [file s1]

Supplementary Material

# Influence of Magnesium Oxide on the Structure and Catalytic Activity of the Wustite Catalyst for Ammonia Synthesis

Artur Jurkowski, Aleksander Albrecht, Dariusz Moszyński, Rafał Pelka and Zofia Lendzion-Bieluń \*

Department of Inorganic Chemical Technology and Environment Engineering, Faculty of Chemical Technology and Engineering, West Pomeranian University of Technology in Szczecin, Piastów Ave. 42, 71-065 Szczecin, Poland

\* Correspondence: Zofia.Lendzion-Bielun@zut.edu.pl

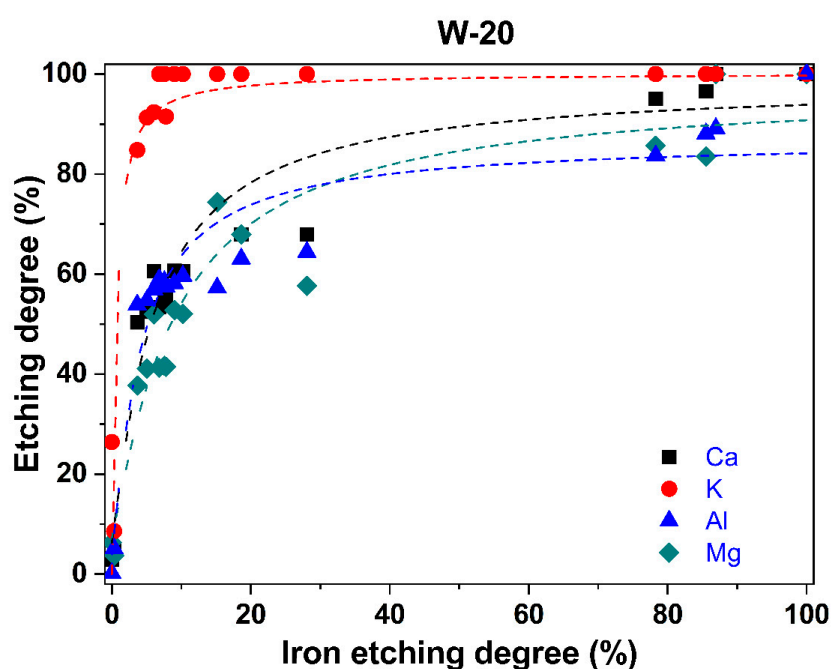

**Figure S1.** The degree of promoters etching related to the degree of iron etching in the precursor W-20.

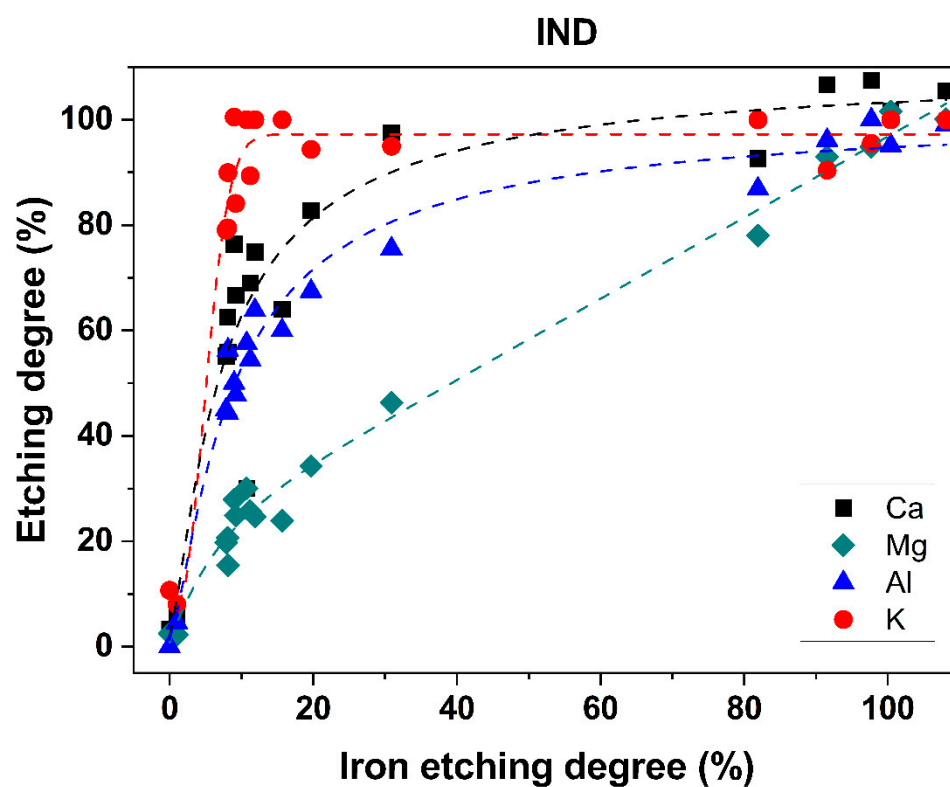

**Figure S2.** The degree of promoters etching related to the degree of iron etching in the precursor IND.

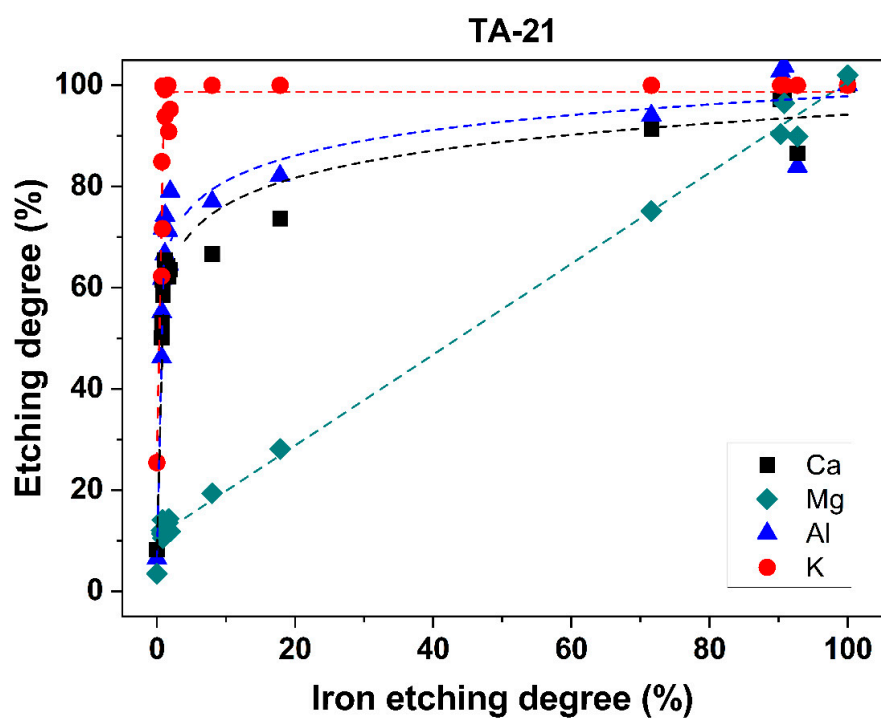

**Figure S3.** The degree of promoters etching related to the degree of iron etching in the precursor TA-21.

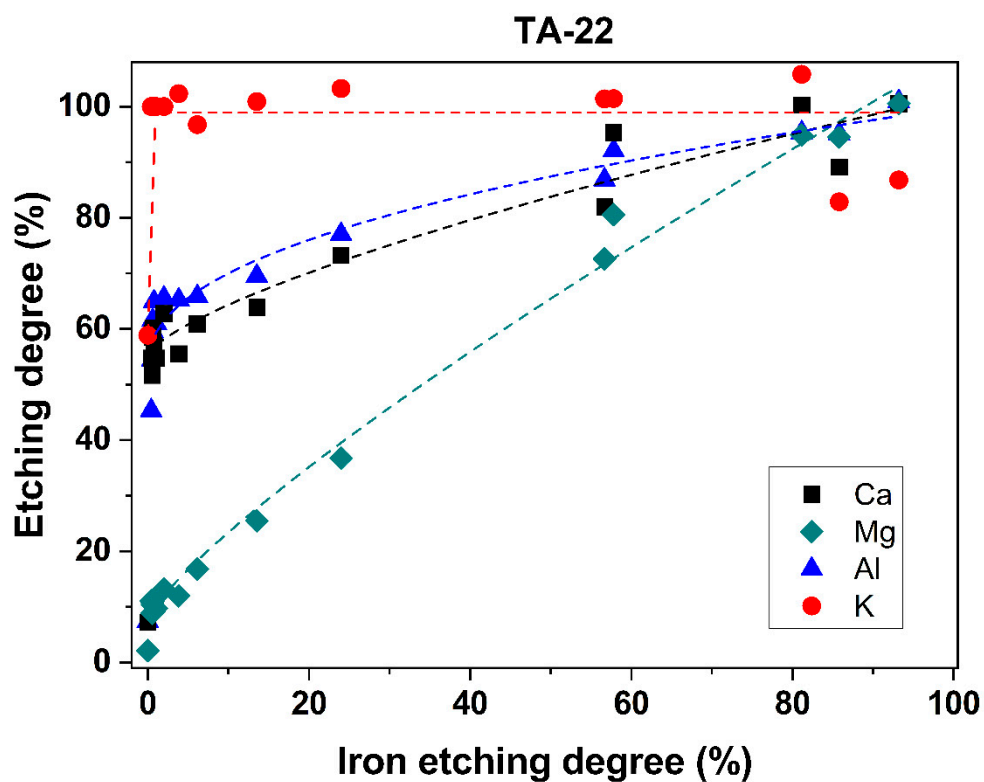

**Figure S4.** The degree of promoters etching related to the degree of iron etching in the precursor TA-22.

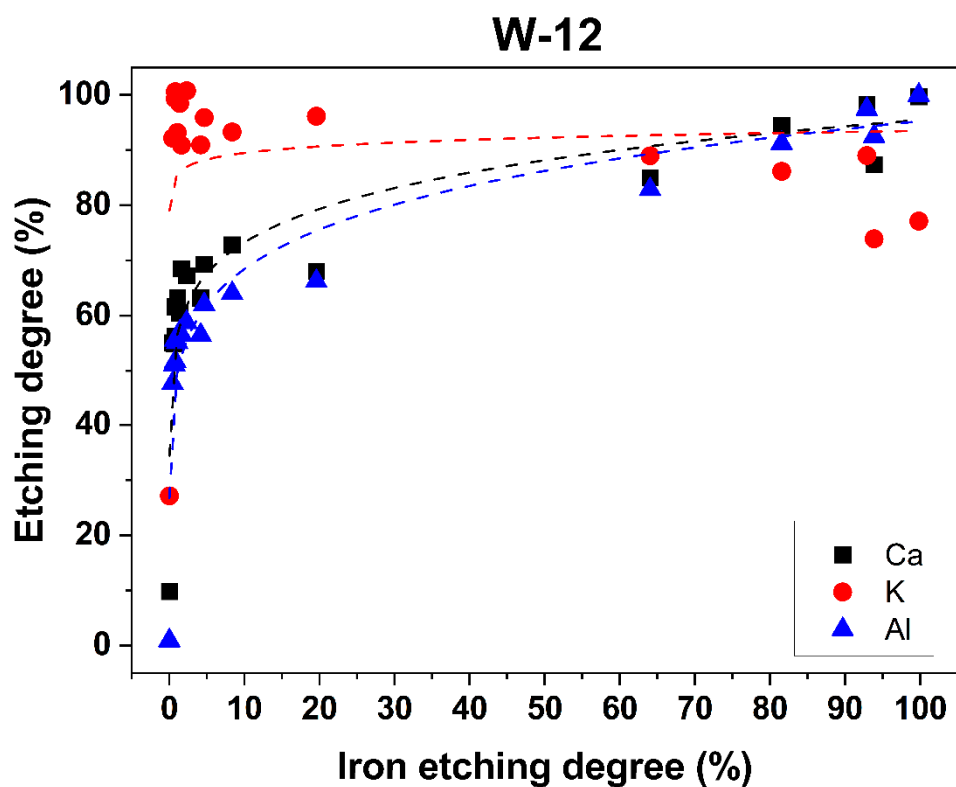

**Figure S5.** The degree of promoters etching related to the degree of iron etching in the precursor W-12.
